# Supplementary material for: Antiproliferative Evaluation of Novel 4-Imidazolidinone Derivatives as Anticancer Agent Which Triggers ROS-Dependent Apoptosis in Colorectal Cancer Cell
Source: MDPI journal article supplement (doi:10.3390/molecules27248844), 2022-12-13
Supplement: s1 [file s1]

Antiproliferative evaluation of novel 4-imidazolidinone derivatives as anticancer agent which triggers ROS-dependent apoptosis in colorectal cancer cell

Jiuhong Huang, Juanli Wang, Guiting Song, Chunsheng Hu, Zhigang Xu, Zhongzhu Chen, Chuan Xu, Donglin Yang

Table S1. The inhibition rate of compounds 9 in tumor cells.

| Compound 9 |                |                |                                 |                                     | Inhibition rate (%) |          |           |           |
|------------|----------------|----------------|---------------------------------|-------------------------------------|---------------------|----------|-----------|-----------|
| Compound   | R <sup>1</sup> | R <sup>2</sup> | R <sup>3</sup>                  | Ar                                  | HCT116              | Hela     | Hep3B     | U87       |
| <b>9a</b>  | 4-Br           | Cyclohexyl     | Bn                              | Ph                                  | 38.9±1.9            | 54.6±5   | 15.1±11.3 | 15.4±4.4  |
| <b>9b</b>  | 4-OMe          | Cyclohexyl     | Bn                              | Ph                                  | 16.7±5.5            | 4.6±10.8 | 1±6.4     | NA        |
| <b>9c</b>  | 4-F            | Cyclohexyl     | Bn                              | Ph                                  | 30.1±5.1            | 46.7±5.1 | NA        | 8.3±5     |
| <b>9d</b>  | 3-Cl           | Cyclohexyl     | Bn                              | Ph                                  | 29.4±3.8            | 61.5±4.4 | 19.4±5.6  | 17.5±8.2  |
| <b>9e</b>  | H              | Cyclohexyl     | Bn                              | Ph                                  | 34.8±3.6            | 22±7     | NA        | NA        |
| <b>9f</b>  | 4-Br           | Cyclopentyl    | Bn                              | Ph                                  | 51.9±3.4            | 51.2±2.8 | NA        | 3.8±3.2   |
| <b>9g</b>  | 3,4-di-OMe     | Cyclopentyl    | Bn                              | Furyl                               | 23.7±2.4            | NA       | 1.8±6     | 5.6±15.5  |
| <b>9h</b>  | H              | Cyclopentyl    | Bn                              | 4-Br-C <sub>6</sub> H <sub>4</sub>  | 13.3±2.9            | 12.5±3.5 | NA        | 5.8±6.3   |
| <b>9i</b>  | 4-Cl           | Cyclopentyl    | 3-F-Bn                          | 4-OMe-C <sub>6</sub> H <sub>4</sub> | 33.6±2.9            | NA       | NA        | NA        |
| <b>9j</b>  | 3-Br           | Cyclopentyl    | Bn                              | 4-OMe-C <sub>6</sub> H <sub>4</sub> | 30.5±5              | 7.1±8.9  | NA        | NA        |
| <b>9k</b>  | 4-Br           | Cyclobutyl     | Bn                              | Ph                                  | 21.4±3.7            | NA       | NA        | NA        |
| <b>9l</b>  | 4-Br           | Acyclic Propyl | Bn                              | Ph                                  | 24.1±4.9            | 72±3.7   | NA        | 39.3±3    |
| <b>9m</b>  | 4-Br           | Acyclic Propyl | PhC <sub>2</sub> H <sub>4</sub> | Ph                                  | 30.4±3.5            | 49.2±7.1 | NA        | 20.3±13.2 |
| <b>9n</b>  | 3-Cl-4-F       | Acyclic Propyl | Bn                              | Ph                                  | 27.7±11.2           | 49±2.7   | NA        | 19.2±5.8  |
| <b>9o</b>  | 4-Br           | Acyclic Propyl | Cy                              | Ph                                  | 25.1±8.9            | 36.7±8.5 | NA        | 26.1±3.9  |
| <b>9p</b>  | 4-F            | Acyclic Propyl | Bn                              | Piperonylic                         | 29.1±6.5            | 31.8±6.5 | NA        | 24.5±5.6  |
| <b>9q</b>  | 3,4-di-OMe     | Acyclic Propyl | Bn                              | Ph                                  | 35.9±4.6            | 21.7±7.1 | NA        | NA        |
| <b>9r</b>  | 4-Br           | Acyclic Propyl | Bn                              | Furyl                               | 69.3±3.1            | 84.1±2.1 | 57.7±2.4  | 87.5±1.5  |
| <b>9s</b>  | 4-OMe          | Acyclic Propyl | Cy                              | 4-Br-C <sub>6</sub> H <sub>4</sub>  | 37.1±4.4            | 9.2±6.1  | NA        | 8.9±10.9  |

The inhibition rate is described as “NA” if the value is below 0.

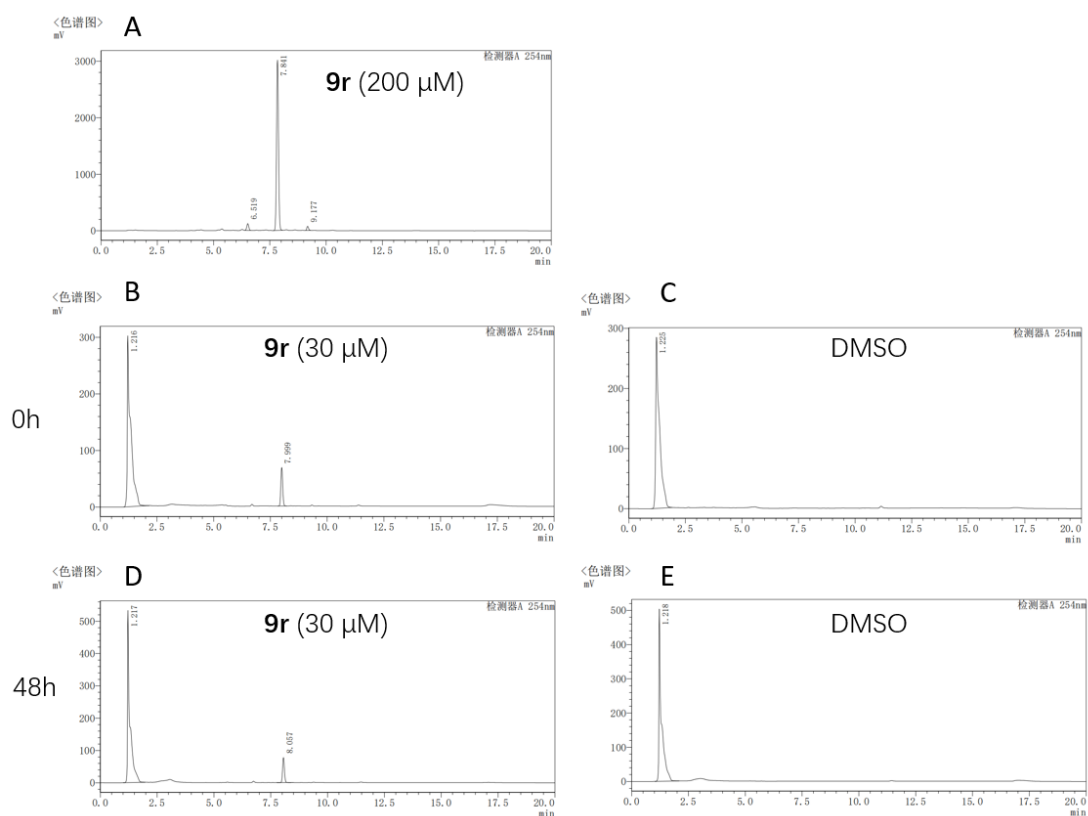

Figure S1. HPLC chromatograms of standards of compound **9r** (200  $\mu$ M in methanol) (A), 30  $\mu$ M compound **9r** in medium containing 10% FBS (B), DMSO in medium containing 10% FBS (C), 30  $\mu$ M compound **9r** in medium containing 10% FBS after 48 hours of incubation (D), DMSO in medium containing 10% FBS after 48 hours of incubation (E). HPLC: High performance liquid chromatography, DMSO: Dimethyl sulfoxide, FBS: Fetal bovine serum.

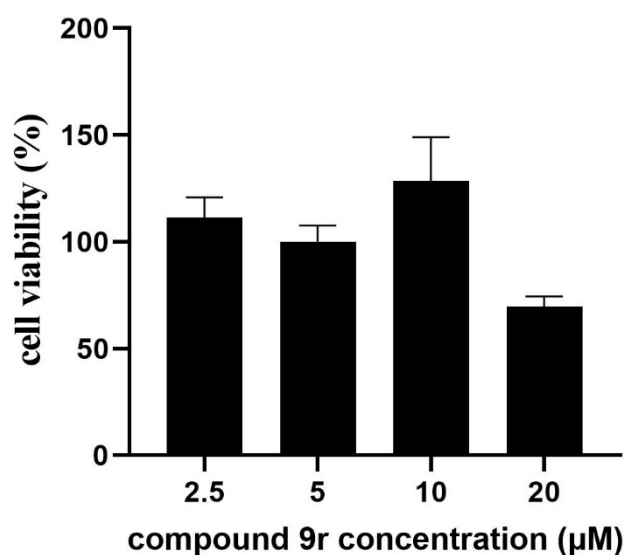

Figure S2. FHC cell viability after compound **9r** treated for 72 hours.
